# Supplementary material
Source: Research Square preprint supplement (doi:10.21203/rs.3.rs-9151756/v1)
Supplement: Supplementary file 1 [file 619cc316ff2de5707771721e.docx]

**Supplementary File A**

**Table S1. Electronic database search strategies**

| Database | Search strategy (exact string) |
| --- | --- |
| PubMed/MEDLINE | (("Bariatric Surgery"[Mesh] OR "Gastric Bypass"[Mesh] OR "Gastrectomy, Sleeve"[Mesh] OR bariatric*[tiab] OR "metabolic surgery"[tiab] OR "weight loss surgery"[tiab] OR "gastric bypass"[tiab] OR "Roux-en-Y"[tiab] OR RYGB[tiab] OR "sleeve gastrectomy"[tiab] OR "one anastomosis gastric bypass"[tiab] OR OAGB[tiab] OR "mini gastric bypass"[tiab] OR "biliopancreatic diversion"[tiab] OR BPD[tiab] OR "duodenal switch"[tiab]) AND ("Seizures"[Mesh] OR "Epilepsy"[Mesh] OR seizure*[tiab] OR epilep*[tiab] OR "status epilepticus"[tiab] OR convulsion*[tiab] OR "new-onset seizure"[tiab] OR "acute symptomatic seizure"[tiab])) |
| Embase | ('bariatric surgery'/exp OR 'gastric bypass'/exp OR 'sleeve gastrectomy'/exp OR bariatric*:ti,ab OR 'metabolic surgery':ti,ab OR 'weight loss surgery':ti,ab OR 'gastric bypass':ti,ab OR 'roux-en-y':ti,ab OR rygb:ti,ab OR 'sleeve gastrectomy':ti,ab OR 'one anastomosis gastric bypass':ti,ab OR oagb:ti,ab OR 'mini gastric bypass':ti,ab OR 'biliopancreatic diversion':ti,ab OR bpd:ti,ab OR 'duodenal switch':ti,ab) AND ('seizure'/exp OR 'epilepsy'/exp OR 'status epilepticus'/exp OR seizure*:ti,ab OR epilep*:ti,ab OR convulsion*:ti,ab OR 'new onset seizure':ti,ab OR 'acute symptomatic seizure':ti,ab) |
| Web of Science Core Collection | TS=((bariatric* OR "metabolic surgery" OR "weight loss surgery" OR "gastric bypass" OR "Roux-en-Y" OR RYGB OR "sleeve gastrectomy" OR "one anastomosis gastric bypass" OR OAGB OR "mini gastric bypass" OR "biliopancreatic diversion" OR BPD OR "duodenal switch") AND (seizure* OR epilep* OR "status epilepticus" OR convulsion* OR "new-onset seizure" OR "acute symptomatic seizure")) |

Abbreviations: BPD, biliopancreatic diversion; OAGB, one anastomosis gastric bypass; RYGB, Roux-en-Y gastric bypass; TS, topic.

**Table S2. Risk of bias assessment for included case reports (JBI Case Report Checklist)**

| Study (Author, Year) | Q1 | Q2 | Q3 | Q4 | Q5 | Q6 | Q7 | Q8 | Overall risk of bias |
| --- | --- | --- | --- | --- | --- | --- | --- | --- | --- |
| Kim et al. (2022) | Yes | Yes | Yes | No | Yes | Yes | Yes | Yes | Low |
| Sedano et al. (2022) | Yes | Yes | Yes | Yes | Yes | Yes | Yes | Yes | Low |
| McManus et al. (2021) | Yes | Yes | Yes | Yes | Yes | Yes | Yes | Yes | Low |
| Abtin Kevin Farahmand (2020) | Yes | Yes | Yes | Yes | Yes | Yes | Yes | Yes | Low |
| Lubna El Sheikh (2020) | Yes | Yes | Yes | Yes | No | Yes | No | Yes | Low |
| Conaty et al. (2019) | Yes | Yes | Yes | No | Yes | No | No | No | High |
| Tornincasa et al. (2018) | Yes | Yes | Yes | Yes | Yes | Yes | Yes | Yes | Low |
| Spandana Brown (2018) | Yes | No | Yes | No | Yes | No | Yes | Yes | Intermediate |
| Joseph Grogg (2018) | Yes | Yes | Yes | Yes | Yes | Yes | Yes | Yes | Low |
| Pradeep R. Alta (2015) | Yes | No | Yes | Yes | Yes | Yes | Unclear | Yes | Intermediate |
| Katherine J. Hahn (2015) | Yes | Yes | Yes | Yes | Yes | Yes | Unclear | Yes | Low |
| Rao et al. (2014) | Yes | Yes | Yes | Yes | Yes | Yes | Yes | Yes | Low |
| Lee et al. (2011) | Yes | Yes | Yes | Yes | Yes | Yes | Yes | Yes | Low |
| John Y. Choi (2004) | Yes | Yes | Yes | Yes | Yes | Yes | Yes | Yes | Intermediate |
| Salvado et al. (2000) | Yes | Yes | Yes | Yes | Unclear | Yes | Unclear | Yes | Intermediate |

Q1, patient’s demographic characteristics clearly described; Q2, patient’s history clearly described and presented as a timeline; Q3, current clinical condition on presentation clearly described; Q4, diagnostic tests or assessment methods and results clearly described; Q5, intervention(s) or treatment procedure(s) clearly described; Q6, post-intervention clinical condition clearly described; Q7, adverse events (harms) or unanticipated events identified and described; Q8, case report provides takeaway lessons.

**Table S3. Risk of bias assessment for included cohort studies (JBI Cohort Checklist)**

| Study (Author, Year) | Q1 | Q2 | Q3 | Q4 | Q5 | Q6 | Q7 | Q8 | Q9 | Q10 | Q11 | Overall risk of bias |
| --- | --- | --- | --- | --- | --- | --- | --- | --- | --- | --- | --- | --- |
| Antaya (2022) | Yes | Yes | Yes | Yes | Yes | Yes | Yes | Yes | Yes | Not applicable | Yes | Low |
| Woods et al. (2011) | Not applicable | Not applicable | Yes | Unclear | Unclear | Yes | Yes | Yes | Yes | Not applicable | Unclear | High |
| Marsk et al. (2010) | Yes | Yes | Yes | No | No | Yes | Yes | Yes | Yes | Unclear | Yes | Intermediate |

Q1, groups recruited from the same population; Q2, groups recruited in the same way; Q3, exposure measured in a valid and reliable way; Q4, confounding factors identified; Q5, strategies to deal with confounding stated; Q6, participants free of the outcome at baseline (or at the start of follow-up); Q7, outcomes measured in a valid and reliable way; Q8, follow-up time reported and sufficient for outcomes to occur; Q9, follow-up complete (or reasons for loss to follow-up described); Q10, strategies to address incomplete follow-up used; Q11, appropriate statistical analysis used.
